# Supplementary material
Source: publisher figshare collection journal article supplement (https://tandf.figshare.com/ndownloader/files/16551845)
Supplement: Supplementary file 1 [file 16551845]

**Table S1.** The minimum daily doses of frequently prescribed antidepressant agents, which have been defined as effective by the GSRD. Abbreviations: GSRD = Group for the Study of Resistant Depression.

| **Antidepressants** | **Minimal doses** | **Antidepressants** | **Minimal doses** |
| --- | --- | --- | --- |
| *Selective serotonin reuptake inhibitors* | | *Serotonin-norepinephrine reuptake inhibitors* | |
| Escitalopram | 10 mg | Venlafaxine | 75 mg |
| Citalopram | 20 mg | Duloxetine | 60 mg |
| Sertraline | 50 mg | Milnacipran | 100 mg |
| Paroxetine | 20 mg | *Serotonin antagonist and reuptake inhibitors* | |
| Fluoxetine | 20 mg | Trazodone | 150 mg |
| Fluvoxamine | 50 mg | Nefazodone |  |
| *Noradrenergic and specific serotonergic antidepressants* | | *Noradrenaline reuptake inhibitor* | |
| Mirtazapine | 15 mg | Reboxetine | 8 mg |
| Mianserine | 30 mg | *Norepinephrine-dopamine reuptake inhibitor* | |
| *Tricyclic antidepressants* | | Bupropion | 300 mg |
| Amitryptiline | 150 mg | *Monoamine-oxidase inhibitors* | |
| Nortriptyline | 100 mg | Moclobemide | 450 mg |
| Clomipramine | 150 mg | Phenelzine | 60 mg |
| Desipramine | 150 mg | Others | |
| Imipramine | 150 mg | Agomelatine | 25 mg |
| Maprotiline | 150 mg | Tianeptine | 37,5 mg |
| Dosulepine | 200 mg | Amoxapine | 300 mg |
| Protiptyline | 75 mg |
| Dothiepin | 200 mg |
